1 **Benefits and Challenges of Using Virtual Primary Care During the COVID-19**  
2 **Pandemic: From Key Lessons to a Framework for Implementation**

3  
4 **Authors:** Edmond Li, Rosy Tsopra, Geronimo Larrain Gimenez, Alice Serafini, Gustavo Gusso, Heidrun  
5 Lingner, Maria Jose Fernandez, Greg Irving, Davorina Petek, Robert Hoffman, Vanja Lazic, Memarian  
6 Ensieh, Tuomas Koskela, Claire Collins, Sandra Milena Espitia, Ana Clavería, Katarzyna Nessler, Braden  
7 Gregory O’Neill, Kyle Hoedebecke, Mehmet Urgan, Liliana Laranjo, Saira Ghafur, Gianluca Fontana,  
8 Azeem Majeed, Josip Car, Ara Darzi, Ana Luisa Neves

9  
10 **Full address of the authors:** Institute of Global Health Innovation, Room 1035/7, QEQM Wing, St  
11 Mary’s Campus, London W2 1NY

12 **Target journal:** BMJ Quality and Safety

13  
14  
15  
16  
17  
18  
19  
20  
21  
22  
23  
24  
25  
26

27 **Corresponding author**

28 Name: Ana Luisa Neves

29 Address: Institute of Global Health Innovation, Room 1035/7, QEQM Wing, St Mary’s Campus, London  
30 W2 1NY

31 E-mail: [ana.luisa.neves14@ic.ac.uk](mailto:ana.luisa.neves14@ic.ac.uk)

32 Telephone: 02033127259

33 Fax number: 02033126309

34 **Word count:** 3,970 words

35 **Abstract**

36 **Background:** With the onset of COVID-19, general practitioners (GPs) and patients worldwide swiftly  
37 transitioned from face-to-face to digital remote consultations. There is a need to evaluate how this global  
38 shift has impacted patient care, healthcare providers, patient and carer experience, and health systems.

39 **Objective:** We explored GPs' perspectives on the main benefits and challenges of using digital remote  
40 care.

41 **Methods:** GPs across 20 countries completed an online questionnaire between June – September 2020.  
42 GPs' perceptions on main barriers and challenges were explored using free-text questions. Thematic  
43 analysis was used to analyse the data.

44 **Results:** 1,605 respondents participated in our survey. The benefits identified included reducing COVID-  
45 19 transmission risks, guaranteeing access and continuity of care, improved efficiency, faster access to care,  
46 improved convenience and communication with patients, greater work flexibility for providers, and  
47 hastening the digital transformation of primary care and the accompanying legal frameworks.

48 Main challenges included patient's preference for face-to-face consultations, digital exclusion, lack of  
49 physical examinations, clinical uncertainty, delays in diagnosis and treatment, overuse and misuse of digital  
50 remote care, and unsuitability for certain types of consultations. Other challenges include the lack of formal  
51 guidance, higher workloads, remuneration issues, organisational culture, technical difficulties,  
52 implementation and financial issues, and regulatory weaknesses.

53 **Conclusion:** At the frontline of care delivery, GPs can provide important insights on what worked well,  
54 why, and how. Lessons learned during the emergency phase can be used to inform the stable adoption of  
55 virtual care solutions, and co-design processes and platforms that are technologically robust, secure, and  
56 supported by a strategic long-term plan.

57

58 **Keywords:** Telemedicine, primary care, quality of care, patient safety, digital health

59

## 60 **Introduction**

61 For decades, there have been many initiatives to implement virtual care into healthcare systems. In the US,  
62 Kaiser Permanente offers secure email communication and routine telephone and video consultations [1].  
63 In the UK, the use of telephone consultations is commonplace [2]. Many other healthcare systems  
64 worldwide have advocated similarly for a virtual approach [3–9].

65 The use of virtual care, either via telephone, video, or online technologies, has potential implications on the  
66 six domains of quality of care: timeliness, efficiency, patient-centredness, effectiveness, safety, and equity  
67 [10]. Virtual consultations can reduce delays in the diagnosis and treatment, thus improving timeliness [11].  
68 They can also facilitate access for patients living in isolated areas, and reduce inequities in care delivery  
69 [12–14]. Remote care can improve primary care efficiency by acting as a gatekeeper by remotely triaging  
70 patients, identifying those who require urgent face-to-face care from those who can be managed virtually  
71 [15–17]. While some studies have suggested that virtual care can improve efficiency and generate time  
72 savings [18,19], others did not find a statistically significant reduction [20]. Remote care can support the  
73 delivery of more patient-centred care and the development of self-management skills [21,22]. Virtual care  
74 can be effective in the management of chronic conditions, including chronic obstructive pulmonary disease,  
75 heart failure, and diabetes mellitus [23]. Studies have also suggested improvements on patient safety and a  
76 potential reduction in hospital admissions [20,23]. However, despite the promised benefits, virtual care has  
77 been integrated slowly into primary care. A wide range of obstacles have limited widespread adoption,  
78 including cultural, regulatory and policy, industrial and technical, knowledge, financial, and market-related  
79 barriers [24].

80 With the onset of COVID-19, the primary care landscape was radically transformed [25,26]. Many  
81 countries have released national guidance encouraging the use of virtual triage and consultation systems  
82 [26]. In a few weeks, General Practitioners (GPs) and patients worldwide transitioned from face-to-face  
83 consultations to virtual care [27]. Whilst previous evidence surrounding the use of remote care in general  
84 practice came from relatively small and local clinical trials, this pandemic forced patients, healthcare  
85 providers, and healthcare systems to embrace virtual consultations as the primary route to access care. Thus,  
86 this presents us with a unique opportunity to learn more from this global real-life experiment, identify the  
87 main challenges and benefits experienced, and incorporate these lessons into the future of virtual primary  
88 care [28].

89 As healthcare providers on the frontline of care delivery, GPs are excellently placed to identify the benefits  
90 and challenges of using digital tools for remote care. This study aimed to explore GPs' perspectives on the  
91 main benefits and challenges of using virtual care, mapping them against the main domains of quality of  
92 care whenever possible. As a secondary aim, we sought to summarise findings as a framework of  
93 recommendations for the implementation of virtual care delivery in primary care settings.

94

## 95 **Methods**

96 The study used an online questionnaire survey of GPs in twenty countries. Recruitment took place  
97 between June – September 2020.

98

### 99 *Study population*

100 The inSIGHT Research Group is a worldwide collaboration of primary care researchers exploring the  
101 impact of the COVID-19 pandemic on the adoption of virtual primary care. The research group is spread  
102 across 20 countries (Australia, Brazil, Canada, Chile, Colombia, Croatia, Finland, France, Germany,  
103 Ireland, Israel, Italy, Poland, Portugal, Slovenia, Spain, Sweden, Turkey, United Kingdom, United

104 States). Participants were eligible for the survey if they were GPs working in these countries between  
105 March and September 2020.

106  
107 *Sampling*  
108 Each local lead sent an email invitation to GPs in their country and shared the link to the survey in social  
109 media channels (e.g., LinkedIn, Twitter, Facebook). Local leads who had difficulty achieving the minimum  
110 number required used snowballing to increase the number of responses. Snowballing is a recognised  
111 technique for recruiting hard-to-reach populations in health studies [29–31].

112  
113 *Description of the questionnaire*  
114 The questionnaire included 30 items assessing GPs' perspectives on the adoption and experience of  
115 virtual care solutions during the COVID-19 outbreak. Participants' characteristics were collected,  
116 including age, gender, country, practice setting, number of years of experience as GP, and involvement in  
117 teaching activities. GPs' perceptions on the main benefits and challenges of using virtual care were  
118 assessed using free-text questions.

119 *Data analysis*  
120 Participants' characteristics were analysed using descriptive statistics. Two independent researchers  
121 systematically reviewed the transcripts using the framework analysis method, which includes five main  
122 stages: familiarisation, identifying a thematic framework, indexing, charting, and mapping and  
123 interpretation [19]. At every stage of the data analysis process, the coding framework was kept deductive  
124 and inductive, allowing the inclusion of emergent themes. The coding tree was shared between all  
125 researchers for iterative refinement until consensus was reached. Resultant themes, subthemes, and the  
126 relationships between them, will be visualised using the Miro online whiteboard application [32]. As  
127 participants did not provide consent for further contact, it was not possible to ask them to provide feedback  
128 on the findings. The Consolidated Criteria for Reporting Qualitative Studies checklist was used to ensure  
129 the study meets the recommended standards of qualitative data reporting.

130  
131 *Ethics*  
132 Overall ethical approval for this project was granted by the Imperial College Research Ethics Committee  
133 (ICREC) (Reference 20IC5956). This is a dedicated ethics oversight body at Imperial College London for  
134 all health-related research involving human participants. In addition, whenever necessary, local ethical  
135 approval and relevant permissions in the respective participating countries were also obtained.

## 136 **Results**

137 *Participants' characteristics*  
138 1,605 participants participated in the questionnaire. Most respondents (79.3%) were aged 30-59 years, and  
139 60.9% were female (n=978). Most of the participants have been working as GPs for a minimum of 5 years  
140 (79.1%, n=1,329) and reported being involved in teaching activities (63.7%, n=1,023). More than half  
141 (62.5%) worked in an urban setting (n=1,004). A full description of the participants, including a breakdown  
142 per country, is shown in **Table 1**.

143 **Table 1. Participants' characteristics**

| <i>Characteristics</i>            | <i>n (%)</i> |
|-----------------------------------|--------------|
| <b>Gender, n (%)</b>              |              |
| <i>Female</i>                     | 978 (60.9)   |
| <i>Male</i>                       | 616 (38.4)   |
| <i>No response</i>                | 10 (0.6)     |
| <i>Other</i>                      | 2 (0.1)      |
| <b>Age category, n (%)</b>        |              |
| <i>Under 30</i>                   | 101 (6.3)    |
| <i>30-39</i>                      | 531 (33.1)   |
| <i>40-49</i>                      | 415 (25.8)   |
| <i>50-59</i>                      | 327 (20.4)   |
| <i>60-69</i>                      | 210 (13.1)   |
| <i>70+</i>                        | 18 (1.1)     |
| <i>Prefer not to answer</i>       | 4 (0.2)      |
| <b>Country, n (%)</b>             |              |
| <i>Australia</i>                  | 99 (6.2)     |
| <i>Brazil</i>                     | 53 (3.3)     |
| <i>Canada</i>                     | 53 (3.3)     |
| <i>Chile</i>                      | 58 (3.6)     |
| <i>Colombia</i>                   | 63 (3.9)     |
| <i>Croatia</i>                    | 62 (3.9)     |
| <i>Finland</i>                    | 54 (3.4)     |
| <i>France</i>                     | 62 (3.9)     |
| <i>Germany</i>                    | 50 (3.1)     |
| <i>Ireland</i>                    | 267 (16.6)   |
| <i>Israel</i>                     | 79 (4.9)     |
| <i>Italy</i>                      | 97 (6)       |
| <i>Poland</i>                     | 66 (4.1)     |
| <i>Portugal</i>                   | 95 (5.9)     |
| <i>Slovenia</i>                   | 77 (4.8)     |
| <i>Spain</i>                      | 100 (6.2)    |
| <i>Sweden</i>                     | 76 (4.7)     |
| <i>Turkey</i>                     | 63 (3.9)     |
| <i>UK</i>                         | 77 (4.8)     |
| <i>United States of America</i>   | 54 (3.4)     |
| <b>Setting, n (%)</b>             |              |
| <i>Mixed</i>                      | 358 (22.3)   |
| <i>Rural</i>                      | 244 (15.2)   |
| <i>Urban</i>                      | 1004 (62.5)  |
| <b>Experience, n (%)</b>          |              |
| <i>&lt; 5 years</i>               | 336 (20.9)   |
| <i>5 - 10 years</i>               | 359 (22.4)   |
| <i>10 - 15 years</i>              | 242 (15.1)   |
| <i>15 - 20 years</i>              | 174 (10.8)   |
| <i>&gt; 20 years</i>              | 495 (30.8)   |
| <b>Teaching activities, n (%)</b> |              |
| <i>Yes</i>                        | 1023(63.7)   |
| <i>No</i>                         | 569 (35.4)   |
| <i>Prefer not to answer</i>       | 14 (0.9)     |

144  
145  
146

147 **Main benefits**

148 Benefits clustered around three main themes (**Figure 1, Textbox 1**): benefits for quality and safety of care  
149 (i.e., safety, effectiveness, equity, efficiency, timeliness, patient-centredness), for health care professionals,  
150 and for health care systems.

151  
152 *Benefits for quality of care*

153 The reduced risk of COVID-19 transmission was identified as the main safety benefit. Participants also  
154 recognised that virtual care had benefits on effectiveness, ensuring accessibility and continuity of care for  
155 both COVID-19 and non-COVID-19 patients. Participants highlighted that virtual care has improved equity  
156 in access to care for some groups of patients (e.g., frail elderly people, those with mobility issues, or living  
157 far from clinics or in geographically isolated areas). Improvements concerning the efficiency of care  
158 included the ability to perform remote triage, reduce unnecessary face-to-face visits (i.e., mild illnesses,  
159 prescription renewal, or administrative tasks), and optimise the use of human resources (i.e., enhancing  
160 communication between providers). Participants also believed that virtual care improved timeliness,  
161 including less time spent in physical dislocation, waiting for administrative procedures, or for clinical  
162 appointments. Participants described several benefits for patient-centredness, such as improved  
163 convenience and communication, and a positive effect on patient-doctor relationship – often against their  
164 prior expectations. GPs acknowledged the importance of virtual care on patient empowerment, by  
165 increasing self-care awareness for minor illnesses, and improving self-management.

166  
167 **Textbox 1. Main benefits: thematic analysis of the participants’ narratives (Table is author’s original**  
168 **work)**

169

**THEME 1: BENEFITS FOR QUALITY OF CARE**

***Subtheme 1.1. Improved safety: Reduced risk of COVID-19 transmission***

- “[Digital technologies] allowed decreasing the exposure to infection to both health providers as well as patients” (ID 312, Colombia)

***Subtheme 1.2. Improved effectiveness: (access and continuity of care) and equity***

- “Able to rapidly adapt to the new reality of Covid. We closed the front door but could still keep providing patient care.” (ID 924, Ireland)
- “Continuing care with patients who otherwise might not have attended the practice because of concern about infection.” (ID 1570, Australia)
- “the possibility of taking care of the patients even without seeing them.. especially [ensuring the] patient did not feel abandoned.” (ID 215, Italy)
- “[Digital remote care] allowed us to remain accessible and in contact with our patients (ID253, Spain)
- “Continuity of care for patients with chronic diseases; psychological support or therapy for patients with mental health conditions remotely.” (ID 347, France)
- “Facilitated the follow-up of diagnosed or suspected patients, favouring that isolation does not imply loss of care and detection of complications. Patients and their families or caregivers were supported” (ID387, Spain)
- “Able to continue to care for patients, especially those with acute needs or fragile chronic needs.” (ID 566, USA)
- “[we were] able to provide care for people who have various barriers to accessing in-person care (frail elderly; people who cannot get time off work; people with physical disabilities)” (ID 1446, Canada)
- “Helpful for patients living far from the practice, with infectious diseases, disabilities. Helpful for follow up visits.” (ID 827, Poland)
- “The ability to provide care in remote communities that otherwise have to family physician and would traditionally resort to presenting to the ER” (ID 1336, Canada)

### **Subtheme 1.3. Improved efficiency: triage and practice management**

- *“Ability to triage and bring in patients who need F2F: (408, UK)*
- *“Allow qualified triage by doctors, giving access to face-to-face to the patients that do need it (ID 126, Portugal)*
- *“By doing a prior telephone screening, face-to-face assistance and follow-up could be better prioritized. Before, almost all patients requested a face-to-face appointment as soon as possible without any prioritization or filtering criteria. That was a great improvement.” (ID401, Spain)*
- *“Help filter patients and problems, so that only cases that are critical and need a prompt resolution make it to the healthcare centres” (ID 274, Chile)*
- *“Optimise health resources, especially human resources” (ID 870, Chile)*
- *‘Optimisation of resources to answer the healthcare needs of the population’ (ID 327, Portugal)*
- *‘We have learned that many issues can be taken care of without a face-to-face consultation. This seems to be efficient for both the doctors and the patients’ (ID 10, Finland)*

### **Subtheme 1.4. Improved timeliness**

- *“We had faster access to consultation with colleagues in hospitals for chronic patients, via e-referral without the colleague seeing the patient live.” (ID 1075, Croatia)*
- *“Shorter waiting times to receive care” (ID 149, Colombia)*
- *Meetings with others are efficient, timely and seem easier. No time wasted with travel etc (ID 833, UK&NI)*
- *“Possibility of accessing consultations in a more expedited way” (ID 436, Chile)*
- *Ability to deliver care in a timely fashion. I was pleasantly surprised that the majority of visits were easily done on the telephone or via videoconference without compromising patient safety or satisfaction.” (ID 409, Canada)*

### **Subtheme 1.5. Improved patient-centredness: convenience, communication, and patient empowerment**

- *“The biggest benefits have been increasing access to care and for allowing visits to be able to more seamlessly fit into patients' lives.” (ID 1282, USA)*
- *“Reduce patient discomfort for access to care” (246, Italy)*
- *“[Digital technologies] strengthened communication with patients to offer help and support” (ID 1467, Colombia)*
- *“With technological support [...] the relationship is integrated and modified, often enriched; this actually goes against the clichés of depersonalisation of relationships very often reported by professionals of my generation” (ID 223, Italy)*
- *“[Digital remote care] allowed us to (...) delegate greater responsibilities in self-management of minor health problems (ID253, Spain)*
- *“(…) allowed us to remain accessible and in contact with our patients, and delegate greater responsibilities in self-management of minor health problems (ID253, Spain)*
- *“Educating patients, self-managing minor health issues and hopefully better communication” (ID 1085, Croatia)*

## **THEME 2: BENEFIT FOR HEALTH CARE PROFESSIONALS**

### **Subtheme 2.1. Remote working**

- *‘Possibility to work even if I was in quarantine’ (ID 124, France)*
- *‘Gave me the ability to work from home while I suffered from mild COVID.’ (ID 1516, Sweden)*
- *“The possibility of working remotely allowed me to preventing burnout and conciliating family and professional demands” (ID 47, Portugal)*
- *“Telephone consultations normalized and kept people out of office who needed to be home - allowed clinicians to be away from office when sick and still provide care” (ID 1252, Canada)*

### **Subtheme 2.2. More control over schedule**

- *“Better management of appointments by the physician” (ID 55, Portugal)*
- *“More control for me over my schedule” (ID 110, Israel)*

### **THEME 3: BENEFITS FOR HEALTH CARE SYSTEMS**

#### ***Subtheme 3.1. Hastening the digital transformation***

- *“Working through video consultations was a very positive experience that I never would have tried without the pandemic.” (ID 809, Sweden)*
- *“[It was an] eye opening experience for both doctors and patients, [showing] that telemedicine is helpful and can be safely used.” (ID 827, Poland)*
- *“It was a chance to experience the digital consultation and to see that primary health care can use more advanced digital solutions for taking care of patients. (ID 951, Turkey)*
- *“Learning that one can treat patients in many cases by their symptoms only without a frontal clinical exam” (34, Israel)*
- *“I realised that a lot of things can be done without face-to-face contact which leaves me more time for patients who need to be examined” (Slovenia, ID 838)*
- *“Realize that clinical and non-clinical activities can be performed at a distance saving time, transportation and energy, which could be maintained after the pandemic” (ID 193, Chile)*
- *“Active and transformative learning that a significant proportion of health concerns can be managed remotely (ID 40, Portugal)*
- *“It increased the digital skills of doctors and patients” (295, Italy)*
- *“Upgrade of electronic connection/data transfer between health fond, computer/program provider and family doctor” (ID 1109, Croatia)*

#### ***Subtheme 3.2. Changing legal and regulatory frameworks***

- *“We started online consultation in primary care which was prohibited in Poland before” (ID 556, Poland)*
- *“In Brazil, the biggest benefit was a political one, since only now teleconsultations were made legal in the country.” (ID 79, Brazil)*
- *“I actually got paid for some of the stuff we normally have to do in lunch break or after hours for free.”. (ID 1560, Australia)*
- *[Receiving] payments for such services” (ID 587, USA)*

170

171 *Benefits for healthcare professionals*

172 Some respondents identified the ability to work remotely as a major benefit, as well as having more control  
173 over their schedule.

174

175 *Benefits for healthcare systems*

176 Many respondents underscored the use of virtual care gained during the COVID-19 pandemic has been a  
177 major factor hastening the digital transformation (i.e., increasing awareness and trust, improving digital  
178 skills of both patients and providers, and upgrading technical capacity). Some participants mention the  
179 quick deployment of new digital opportunities (e.g., access to e-referrals, e-prescriptions, and electronic  
180 processing of fit-to-work certificates). Other benefits included changes in legal and regulatory frameworks,  
181 particularly in what concerns the legal context and remunerations of remote care tasks.

182

183



184 **Figure 1: Conceptual map of main benefits identified**

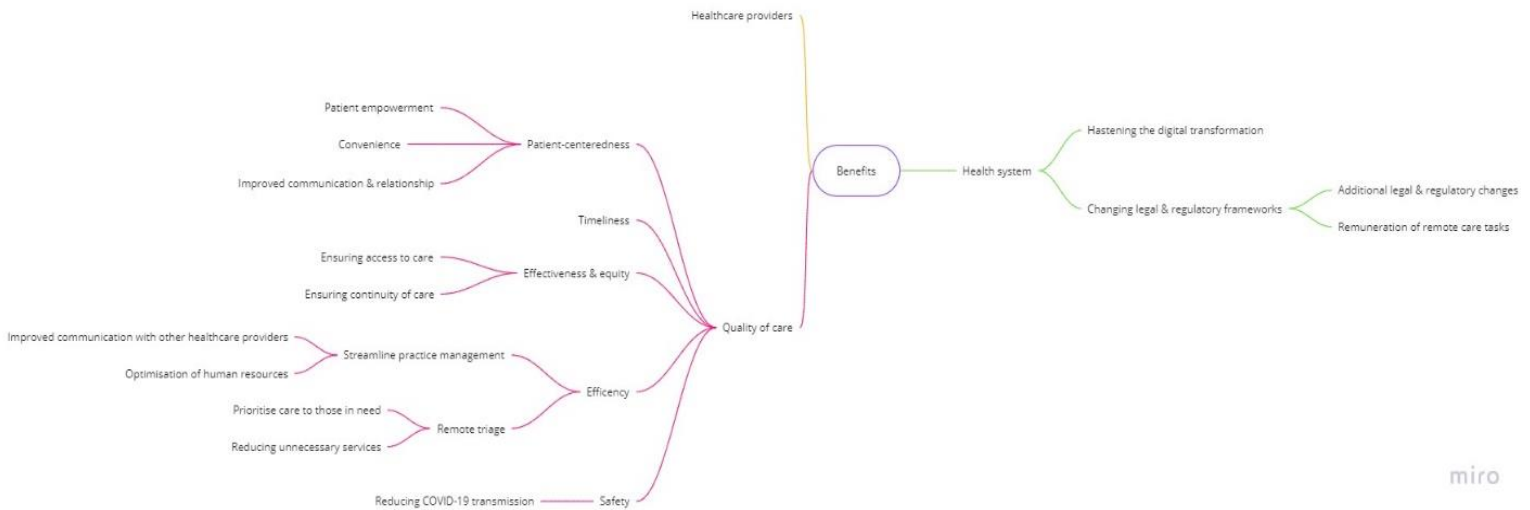

185

## 186 *Main challenges*

187

188 Challenges were broadly summarised into three main areas (**Figure 2, Textbox 2**): for quality of care, for  
189 healthcare providers, and for health care systems.

190

### 191 *Quality of care*

192 Participants were concerned that remote care can negatively impact some aspects of patient-centredness,  
193 including patient preferences and the patient-doctor relationship. In fact, one of the identified detractors to  
194 the use of virtual care was patients' preference for traditional face-to-face consultations. GPs also reported  
195 that it was often difficult to gauge a patient's body language and emotions through digital video/audio  
196 channels, thus impairing their ability to build rapport, express empathy, and provide more holistic care to  
197 their patients. GPs acknowledge this to have a potential negative impact on patients' wellbeing, since  
198 physically attending appointments was an opportunity for social interaction for socially isolated individuals.  
199 For clinicians, remote consultations posed additional challenges for patient communication, particularly in  
200 emotionally difficult situations, or when there was a need to ensure that their medical advice was properly  
201 understood.

202

203 Participants expressed concerns regarding a negative impact on equity, particularly regarding the digital  
204 exclusion of vulnerable patients. They noted that many patients lack access to reliable internet service, and  
205 computers or smartphones to conduct video consultations. Even in circumstances where the hardware is  
206 present, some patients may lack the digital literacy and skills needed to independently set up and use  
207 relevant digital software.

208

209 The most prominent safety challenge was the inability to perform clinical examinations and assess physical  
210 signs to inform clinical decision-making. While some of these issues could be mitigated through careful  
211 history taking and patient self-reporting (e.g., photographs of visible lesions and remote monitoring devices,  
212 such as blood pressure monitors, glucometers, oximeters), GPs mention that few patients had the necessary  
213 devices, and if they had, would often struggle to use them and report the results back. Dealing with  
214 uncertainty, a recognised challenge in primary care, seems to be aggravated by these factors and contribute  
215 to an increased fear of misdiagnosis and inappropriate clinical management.

216  
217 GPs openly expressing concerns that digital remote care could delay diagnosis and treatment. Respondents  
218 reported that these delays could be caused by patients' reluctance to use virtual care, lack of access and  
219 digital skills to use these tools, and communication challenges (i.e., to effectively convey non-verbal  
220 clinical information).

221  
222 GPs also emphasised some potential threats to the efficiency of care delivery. While some patients  
223 expressed hesitancy to use virtual care, others were overly enthusiastic about having a more direct line of  
224 communication with their healthcare provider, often resulting in misuse and overuse. This increase in  
225 patient demand translated into an increase in GPs' workload. Finally, a few quotes highlighted that virtual  
226 care may not be an effective solution for certain types of consultations.

227  
228 **Textbox 2. Main challenges: thematic analysis of the participants' narratives (Table is author's**  
229 **original work)**

230  
231

## **THEME 1: CHALLENGED FOR QUALITY OF CARE**

### ***Subtheme 1.1. Challenges for patient-centredness***

- "Patient preference for face to face due to issues such as poor hearing on devices and patients not having ability to use technology." (ID 1561, Australia)
- "Patients and doctors prefer face to face, many patients pay in Ireland, online isn't acceptable [to them]" (ID 1019, Ireland)
- "Patients are accustomed to meet in GP clinics to talk with one another, especially older patients, lonely, they are waiting for meetings with doctors frequently too. Some have problems with electronic devices." (ID 556, Poland)
- "Lack of human contact, facial and body language. Difficult to show emotions and compassion. I used to close my eyes and imagine the patient on the other side of my table. I expend more time searching the suitable words to overcome the lack of body language" (ID 62, Portugal)
- "Difficulty to build rapport with patients who you don't already know - less trust of HCP" (ID 1033, UK&NI)
- "Harder for people who are socially isolated, coming to the clinic was an important human interaction, form of meeting other patients, the extended team etc." (ID 630, Canada)

### ***Subtheme 1.2. Challenges for equity, and digital exclusion***

- "Some elderly (the ones with the biggest need) have problems using a telephone, let alone a computer..." (ID 1518, Sweden)
- "Unfortunately, a lot of elderly patients (...) do not know how to use digital technology (email, messenger, etc) and in my opinion were deprived during the pandemic." (ID 1075, Croatia)
- "[an unintended consequence was] Neglecting the less technology-oriented patients, which are also the most vulnerable ones - the elderly, the underprivileged, the immigrants etc, and in fact giving preference to the younger healthier patients, thereby deepening health inequality" (ID 254, Israel)

### ***Subtheme 1.3. Challenges for safety***

- "[It is] much harder to make decisions on the phone without examining the patient. Often patients refused to come in for appointments and didn't understand the lack of ability to assess a certain presenting complaint over the phone (e.g., abdominal pain)." (ID 1598, Australia)
- "Not all necessary information concerning a patient's condition can be transmitted digitally/by phone and this causes a risk of not noticing a critical symptom/change in a patient's condition" (ID 8, Finland)
- "I found that I made more mistakes when making the initial diagnosis over email / our app / phone. If there is only a one-way written communication, then it is more easy to get seduced by the patient's view and not valorise objective facts, as we would in a face-to-face consultation." (ID 1320, Croatia)

#### ***Subtheme 1.4. Challenges for timeliness***

- “[A potential challenge was] not detecting patients with for instance atrial flutter because not seeing and examining them. More patients with symptoms of serious diseases are reluctant to seek care. Some are probably missed and come when the disease has progressed. I tried to be aware of this and arrange secure ways to investigate the patients.” (ID 317, Sweden)

#### ***Subtheme 1.5. Challenges for effectiveness***

- “Telephone consultations instead of face-to-face are less effective in many cases. It works fine for minor problems” (ID 440, Sweden)
- “Harder to check up on chronic diseases patients (prescribing medications without physical examination), easier to miss potentially dangerous symptoms, harder to counsel patients in psychological distress (video calls are not common)” (ID 499, Poland)
- “Online tools that don't work as well as they should (for example don't provide all the necessary information for a professional or lead to another face-to-face consultation anyway)” (ID 18, Finland)

#### ***Subtheme 1.6. Challenges for efficiency***

- “Certain patients have been calling in much more frequently for minor issues that they would normally not have contacted their primary care provider for.” (ID 409, Canada)
- “Make people understand what the priorities are and the appropriate times. I have kept the phone on for emergencies and have sometimes been contacted for irrelevant things at inconvenient times.” (ID 169, Italy)
- “Too much access for system abusive patients” (ID 42, Portugal)

### **THEME 2: CHALLENGES FOR HEALTHCARE PROFESSIONALS**

#### ***Subtheme 2.1. Lack of guidance and support***

- “[One challenge was] the lack of previous training neither during undergraduate nor [during] postgraduate training. I have taken some online training. Also, the challenge was the lack of guidelines for primary care doctors.” (ID 158, Poland)

#### ***Subtheme 2.2. Higher workload and burnout***

- “It takes more time to do a remote consultation. It requires preparing the call, reviewing the clinic history and having a checklist according to the patient’s category. If a face-to-face consultation takes 20 min, a remote consultation requires 40-50 min average” (ID 244, Colombia)
- “I felt that my resources were drained by the phone communication. I am less concentrated, more nervous and less compassionate about patients” (ID 286, Israel)
- “Found myself working longer hours as working from home made it much harder to set boundaries around when I stopped work. (ID 1590, Australia)
- “I would contend that the majority of GPs would prefer to consult with their patients' in the real world more often than in the virtual world and that, for example, return to pre-COVID-19 levels of telephone or video consultations, if accompanied by a commensurate increase in in-person consultation, would be a positive development.” (ID 910, Ireland)

#### ***Subtheme 2.3. Remuneration issues***

- “Prior to COVID-19, video and telephone consultations [were] not remunerated by Medicare. Technology was available, but was paid by the user/patient, prior to COVID-19. The telehealth subsidy in Australia is scheduled to end by March 2021, so we will return to dark ages again because patients might not want to pay for healthcare - especially telephone or video consultations, which are seen as low value by patients preferring face to face and hands-on medical care.” (ID 1603, Australia)
- “If government withdraws fees for phone and video consultations then I would be less inclined to use them and more inclined to bring patients into office (sometimes needlessly)” (ID 1245, Canada)

### **THEME 3: CHALLENGES FOR HEALTH CARE SYSTEMS**

#### ***Subtheme 3.1. Organisational culture***

- “Tradition: “we have to return to what we did before... it worked... ”” (ID 178, Chile)
- “People don’t like changes, especially if they have to do something differently, or additionally” (ID 1096, Croatia)
- “People [will] forget easily how digital ways of working facilitated work during the pandemic and [will] easily return to the familiar normality which they knew before the pandemic” (ID 10, Finland)

#### ***Subtheme 3.2. Technical challenges***

- “There is no resources (computers, telephones) for all health workers, therefore not everyone can work through digital techs and personal resources need to be used such as personal phones” (ID 274, Chile)
- “EHR and network problems - overloaded, not prepared for massive digital use of systems, working very slowly. Still waiting for the solution (new server, better internet connection, etc)” (ID 55, Portugal)
- “Lack of efficient digital equipment and software able to communicate with each other, because up to now it means opening many windows over and over again” (ID 199, Chile)
- “No integration between systems and some of them do the same thing instead of complementing each other” (ID7, Portugal)

#### ***Subtheme 3.3. Implementation issues***

- “The technologies were fine, but my health system did a terrible job implementing the changes. They were slow to find video services. They changed the type of video service three times.” (ID 566, USA)

#### ***Subtheme 3.4. Financial issues***

- “They furloughed so many staff personnel that physicians were expected to do digital appts with no staff support. There was no staff to answer phones except two days a week for two weeks. It was a mess.” (ID 566, USA)
- “Public organizations inability to see investments - only costs. Conservative culture within the organization.” (ID 1414, Sweden)
- “Lack of financial investment from governments in such technologies; Patients emotional need to get in touch with medical/other health care workers staff; Specially in Brazil, it is possible that our Medical Council pressure up against telemedicine consultations because it is an issue that before the COVID19 pandemic situation they have never been sympathetic with.” (ID 65, Brazil)
- “Short-sightedness of managers, Unequal distribution of resources, inbred inertia of large systems which resist change” (ID 11, Israel)

#### ***Subtheme 3.5. Legal and regulatory weaknesses***

- “Current legislation limits teleconsultations” (ID 860, Chile)
- “Regulatory barriers across state and geographic lines - overly strict (...) regulations - prevent right care in right venue direction” (ID 1378, USA)
- “In my opinion, the main problem lies in the fact that, according to the Italian code of medical ethics, the medical examination can only take place in presence. This limit has significant repercussions on the lawfulness of the prescription and certification carried out during a video consultation.” (ID 175, Italy)

232

233

234 ***Healthcare providers***

235 The lack of formal training, guidance, and inadequate technical support were notable challenges. During

236 the abrupt shift to virtual care, GPs reportedly had to set up, learn how to use, and troubleshoot new systems.

237 These efforts were seldom well-organised or coordinated and often resulted in considerable transitional  
 238 difficulties. Another major drawback was the higher workload and burnout. Some participants reported that  
 239 they found virtual consultations to be more taxing and time-consuming to perform, which was often  
 240 burdened with increased administrative tasks. As described above, the frequency and ease with which GPs  
 241 could be contacted by patients often blurred the boundaries between their work and personal lives, further  
 242 contributing to an increased workload. The increase in the number of patients observed daily has also  
 243 resulted in less engagement with individual patients and decreased overall work satisfaction. GPs also  
 244 reported inadequate remuneration as a considerable barrier to the continued use of virtual care. Whilst  
 245 payment structures differed across countries, our respondents expressed that payment for remote  
 246 consultation which is commensurate to in-person consultations, is critical to incentivising greater  
 247 acceptance and mainstream use. As many of the remote consultation payment schemes were introduced  
 248 during the initial months of COVID-19 pandemic as emergency measures, some GPs were doubtful that  
 249 these efforts would be sustained over time.

250  
 251 **Health systems**

252 Participants mentioned organisational culture as an impediment against using virtual care. Overcoming  
 253 substantial institutional inertia, the lack of pre-existing teleworking culture, the urgency to shift from  
 254 familiar systems to completely new ones, and challenging the prevailing mentality of ‘*this was always how*  
 255 *things were done*’, were commonly reported organisational barriers. Participants also reported technical  
 256 issues with the digital systems used, including inadequate equipment and infrastructure, and poor systems  
 257 interoperability. In particular, the lack of interoperability between several digital systems, such as  
 258 appointment schedulers, electronic health records, electronic prescriptions, and epidemiological  
 259 surveillance systems, was perceived as a major challenge. GPs also described implementation issues related  
 260 to finances, including a general lack of investment and, more specifically, lack of funding allocated to  
 261 human resources and supporting the costs of systems set-up and maintenance. Respondents noted that  
 262 virtual care delivery did not appear to be in the list of priorities of many healthcare systems or policymakers.  
 263 Finally, GPs identified a range of legal and regulatory weaknesses, highlighting that existing legislation is  
 264 no longer fit for purpose, nor meets the evolving needs resultant from the pandemic.

265  
 266 **Figure 2: Conceptual map of main challenges identified**

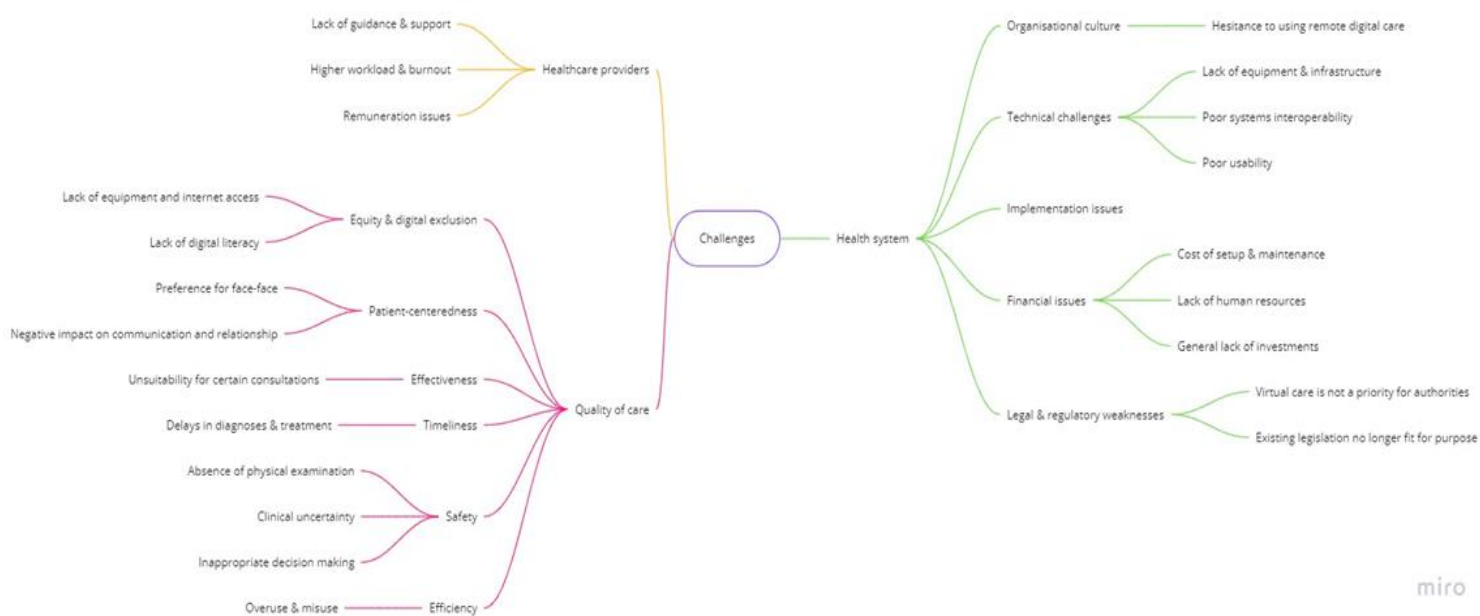

267 **Discussion**

268 *Summary of key findings*

269  
270 Benefits for quality of care were identified for the six dimensions of quality of care, including safety  
271 (reduction of exposure risks for COVID-19 transmission); effectiveness and equity (ensuring access and  
272 continuity of care to those who need it, including those who had previously limitations to access face-to-  
273 face care); efficiency (remote triage), improved timeliness and patient-centredness (convenience,  
274 communication, and patient empowerment). Benefits for healthcare providers included a greater work  
275 flexibility and more control over schedule. Benefits for healthcare systems included a transformative effect,  
276 hastening the digital transformation (increasing awareness, trust, adoption, skills, and technical capacity)  
277 and driving changes in legal and regulatory frameworks.

278  
279 Important challenges have also been noted for six domain of quality of care, including patient-centredness  
280 (patients' preference for face-to-face care, potential negative impact on communication), equity (lack of  
281 equipment, internet access and digital skills of some patient groups), safety (clinical uncertainty and  
282 potentially inappropriate decision making), timeliness (delays in diagnosis and treatment), effectiveness  
283 (unsuitability for certain consultations) and efficiency (overuse and misuse). Challenges specific for  
284 healthcare providers included the lack of guidance and support, higher workload, and remuneration issues.  
285 From the health systems' perspective, the long-established organisational culture, technological challenges,  
286 implementation and financial issues, and lack of accompanying supportive policies and regulatory  
287 legislation, were challenges identified by participants.

288

289 *Strengths and limitations*

290 This is the first international study to explore GPs' perceptions on the main benefits and challenges of using  
291 virtual consultations in primary care. Participants took part from 20 countries worldwide, with diverse  
292 health care systems and levels of healthcare spending. The sample size was large, with participants varying  
293 in age, clinical experience, and type of primary care setting (urban, rural, or mixed). This study employed  
294 a methodologically rigorous approach, leveraging qualitative methods to capture rich, descriptive data on  
295 individual perceptions, attitudes, and behaviours [33,34], performed according to the Consolidated Criteria  
296 for Reporting Qualitative Studies criteria [35]. Finally, the main benefits and challenges were mapped  
297 against a widely recognised framework of Quality of Care [10], whenever possible. Finally, a set of  
298 recommendations was developed based on the main findings, to support providers and healthcare  
299 organisations translate the lessons learned into practice improvements.

300 The results must be interpreted considering some limitations. Our findings are also impacted by common  
301 limitations of survey research, including self-reported answers and self-selection sampling methods. Only  
302 GPs were included in this study; future research should focus on the inclusion of other healthcare  
303 professionals, and especially patients. The themes identified as part of this analysis may not be equally  
304 relevant for each individual country. Further qualitative content analysis could provide novel insights on  
305 their relative importance for individual countries.

306 Finally, virtual care is a broad concept and future research must explore specific nuances of the various  
307 types of technology available (i.e., telephone, video, chat), both in what concerns perceived benefits and  
308 challenges of implementation, and patient preferences.

309

310 *Comparison with previous literature*

311  
312 Remote primary care is widely recognised as an promising solution to ensuring both patient and provider  
313 safety by preventing direct physical contact, hence reducing morbidity and mortality during the COVID-19  
314 pandemic [16,36,37]. However, important safety concerns also manifested, predominantly concerning  
315 diagnostic uncertainty. In this context, previous literature also report GPs' concerns about clinical risk [38]  
316 and the need to establish escalation protocols to support clinicians decide when a transition to urgent in-  
317 person follow-up care, or even to emergency services, is required [37].

318  
319 Our results underline that remote digital tools may be an effective way of delivering primary care. In line  
320 with these findings, a Cochrane systematic review (2015) demonstrated the use of telemedicine strategies  
321 to be associated with increased access to care and improved clinical outcomes in single chronic diseases,  
322 particularly in type 2 diabetes [39]. However, the interventions were heterogenous and the external  
323 generalisability of these findings remain unclear. Future research will be needed to address questions such  
324 as for which patients, and for which conditions, do virtual care tools actually improve effectiveness.

325  
326 Our participants highlighted that virtual care, particularly through remote triage, can reduce the number of  
327 unnecessary visits and thus have a positive impact on efficiency (i.e., minimising waste, including from an  
328 economic perspective). In fact, few telehealth evaluations have examined the association between outcomes  
329 and costs of virtual care. While some reviews have found that virtual care can decrease the use of acute  
330 hospital services [40–42], there is less evidence in the primary care context [43]. On the other hand, our  
331 participants raised concerns about potential overuse and misuse by patients, which could negatively impact  
332 the effectiveness of remote care. In a recent study in Canada (2020) evaluating the uptake of a platform for  
333 virtual visits in primary care, Stamenova *et al.* observed that many virtual visits appeared to replace face-  
334 to-face visits, yet patients did not overwhelm physicians with requests [44].

335  
336 In what concerns timeliness of care, participants identified both potential advantages and disadvantages.  
337 Remote primary care has the potential to offer convenient access to a primary care provider without needing  
338 to take time-off work, arrange transportation, and spend time waiting for face-to-face visits. Participants  
339 were also concerned that barriers to the use of technology and difficulties inherent to a new mode of care  
340 delivery, could result in delays in diagnosis and treatment. There is sparse evidence on the subject.  
341 However, a recent study examined patient-initiated primary care visits in the Kaiser Permanente Northern  
342 California (a system with over four million members) and concluded that, on average, telephone visits  
343 were scheduled 50% sooner than office visits [45]. These findings have profound implications, given that  
344 timeliness of care is associated with improved health outcomes. [46].

345  
346 Remote care has been promised to reduce inequities in access to care for decades, particularly in rural and  
347 geographically remote areas [47–49]. In line with previous literature, our results demonstrate the ability of  
348 remote care to overcome barriers for those who have physical limitations to attend a face-to-face meeting,  
349 but also highlight their potential to entrench existing inequities in access to care [50,51]. Published evidence  
350 shows that the transition to virtual primary care did not unfold in the same manner across communities [52].  
351 Proactive efforts are therefore needed to identify and address both patient and provider-related digital  
352 barriers so as to avoid that the widespread implementation of virtual care in a manner which reinforces  
353 disparities in health access amongst already underserved and excluded groups [52].

354  
355 Equally, with regards to patient-centredness, a range of benefits and challenges have been identified. While  
356 participants consider that remote care can improve convenience and patient empowerment, participants also

357 acknowledge that it can have both negative and positive effects on communication. Another important  
358 challenge is patient preference for face-to-face visits. Preference theory suggests that patients would prefer  
359 a virtual consultation if they perceive its benefits as outweighing its burdens [53]. Multiple factors may  
360 influence patients' preference, including the situation of care (i.e., patient's perception of their clinical  
361 status, treatment requirements, and care pathway), the expectations of care, the demand of care (e.g., social  
362 situation, consequences of choice), the capacity to allocate resources (e.g., patient's ability to allocate  
363 financial, infrastructural, social and healthcare resources) [54] and patients digital health literacy [55,56].  
364 These factors may combine or compete and may be dynamic throughout the patient's journey.

365  
366 The pandemic has a transformational impact in hastening the digital transformation, and in particular  
367 increasing awareness, trust, and adoption of remote care [16,57,58]. Challenges such as the lack of support,  
368 burnout, and remuneration issues, are balanced by a few benefits (i.e., remote working and a better control  
369 over schedule). However, to fully embrace the benefits postulated (e.g., greater flexibility to work remotely  
370 from home), healthcare systems must explore and implement the enablers required. Potential enablers  
371 include single sign-on, sharing of records across systems, electronic generation of form, and the creation of  
372 workspaces and secure interfaces without the need for laptops and VPNs [59]. While the rapid  
373 implementation of virtual consulting tools provides the ability to work more flexibly and from different  
374 locations, primary care leaders need to be supported and learn how to build effective teams via novel  
375 approaches [60].

376  
377 At the health systems level, previous studies have indicated that implementation barriers largely depended  
378 on accreditation, payment systems, and insurance [61]. Prioritisation of financial investments into relevant  
379 infrastructure, greater emphasis on training and guidance for healthcare providers, and updates to the  
380 corresponding legal and regulatory frameworks supporting their use, are equally required. Overcoming  
381 institutional inertia is likely to be more feasible post-COVID-19, given that clinical culture is expected to  
382 have evolved substantially after a year of daily use of remote care delivery. In addition, as many of the  
383 existing guidance and policies on primary remote care were drafted and implemented during the emergency  
384 phase, the experience attained, and evidence collected offers an opportunity to refine, optimise, and update  
385 the relevant accompanying legal and regulatory frameworks.

### 386 387 *Implications for research and policy*

388  
389 Based on our findings, we propose a framework of recommendations for the implementation of virtual care  
390 in the primary care setting (**Figure 3**). The framework consists of suggested action points across five  
391 specific domains for high-quality implementation of virtual care, including contextual considerations,  
392 technology infrastructure, awareness and experience, safety and risk management, and strategic planning  
393 & supporting policies (**Figure 3**). As part of this framework, we emphasise the importance of continuously  
394 monitoring quality across these five areas, which must be collected both through patient & provider  
395 feedback, but also using data-driven approaches to systematically evaluate the impact on equity (e.g., usage  
396 patterns and patients characteristics, patient preferences, and offer of alternative modes of consultation),  
397 effectiveness (e.g., longitudinal monitoring of impact on health outcomes, as well as of the technological,  
398 legal and regulatory infrastructure required to deliver effective care), and safety (e.g., longitudinal  
399 monitoring of safety indicators, including cybersecurity); efficiency (e.g., cost-effectiveness analysis) and  
400 timeliness (e.g., time-to-diagnosis and time-to-treatment). Decisions to adopt remote care services should  
401 be based on evidence of their impact, and responsive to ongoing evaluation & monitoring processes.

402



403 It is important to note that the technological and regulatory landscape is dynamic, as are patients'  
404 preferences. Therefore, virtual care platforms must be secure and reliable, but also flexible enough to  
405 accommodate evolving regulatory, professional, and health-care organisations' requirements [62] – and  
406 processes must ensure that patients are presented with alternative options during their journey.  
407

408 **Figure 3: A framework for implementation of virtual consultations in the primary care setting**  
409

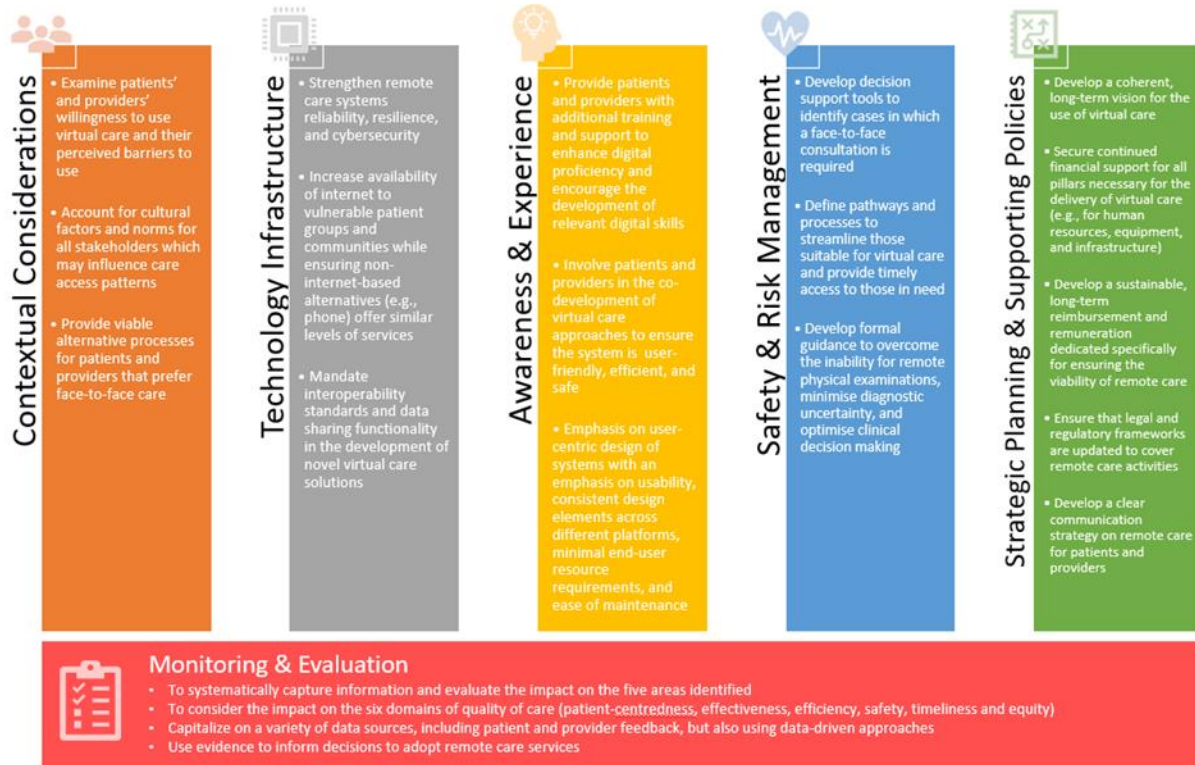

410  
411

## 412 **Conclusion**

413 At the frontlines of care delivery, GPs can provide valuable insights into the use of remote care – what  
414 worked well, how, and why. Experience gained during the emergency phase of the COVID-19 pandemic  
415 can be used to inform the stable adoption of virtual care solutions, the co-designing of processes and  
416 platforms that are technologically robust, and supported by a strategic long-term plan. The development of  
417 such platforms should consider pre-existing health inequities and contextual considerations, and  
418 deliberately implement strategies to minimise digital exclusion and optimise patients' experience. Finally,  
419 primary care health systems need to rigorously evaluate the ongoing impact on virtual primary care both  
420 during and after the pandemic, and incorporate the lessons learned into legal and regulatory frameworks  
421 that support its long-term, sustainable use.

422

## 423 **Funding**

424 This research was supported through the Imperial College National Institute for Health Research (NIHR)  
425 Patient Safety Translational Research Centre (PSTRC) and the European General Practice Research  
426 Network (EGPRN). The funders/sponsors have had no role in development and drafting of this manuscript.  
427

## 428 References

- 429 1 Pearl R. Kaiser Permanente Northern California: Current Experiences With Internet, Mobile, And  
430 Video Technologies. *https://doi.org/10.1377/hlthaff20131005* 2017;**33**:251–7.  
431 doi:10.1377/HLTHAFF.2013.1005
- 432 2 Van Galen LS, Car J. Telephone consultations. *BMJ* 2018;**360**. doi:10.1136/bmj.k1047
- 433 3 McGrail KM, Ahuja MA, Leaver CA. Virtual Visits and Patient-Centered Care: Results of a  
434 Patient Survey and Observational Study. *J Med Internet Res* 2017;**19**. doi:10.2196/JMIR.7374
- 435 4 Fatehi F, Menon A, Bird D. Diabetes Care in the Digital Era: a Synoptic Overview. *Curr Diabetes*  
436 *Reports* 2018 187 2018;**18**:1–8. doi:10.1007/S11892-018-1013-5
- 437 5 Greenhalgh T, Vijayaraghavan S, Wherton J, *et al*. Virtual online consultations: advantages and  
438 limitations (VOCAL) study. *BMJ Open* 2016;**6**:e009388. doi:10.1136/BMJOPEN-2015-009388
- 439 6 NHS England and British Medical Association. Investment and evolution: a five-year framework  
440 for GP contract reform to implement the NHS long term plan. 2019.
- 441 7 Digital Health and Care Scotland. Scotland’s Digital Health and Care Strategy: enabling,  
442 connecting and empowering. 2018;:20.[https://www.gov.scot/publications/scotlands-digital-health-](https://www.gov.scot/publications/scotlands-digital-health-care-strategy-enabling-connecting-empowering/)  
443 [care-strategy-enabling-connecting-empowering/](https://www.gov.scot/publications/scotlands-digital-health-care-strategy-enabling-connecting-empowering/) (accessed 13 Jul 2021).
- 444 8 US Department of Veterans Affairs. Department of Veterans Affairs FY 2018-2024 Strategic Plan.  
445 <https://www.va.gov/oei/docs/VA2018-2024strategicPlan.pdf> (accessed 13 Jul 2021).
- 446 9 National Digital Health Strategy and Framework for Action | Australian Digital Health Agency.  
447 [https://www.digitalhealth.gov.au/about-us/national-digital-health-strategy-and-framework-for-](https://www.digitalhealth.gov.au/about-us/national-digital-health-strategy-and-framework-for-action)  
448 [action](https://www.digitalhealth.gov.au/about-us/national-digital-health-strategy-and-framework-for-action) (accessed 13 Jul 2021).
- 449 10 of Medicine I. *Crossing the Quality Chasm: A New Health System for the 21st Century*.  
450 Washington, DC: : The National Academies Press 2001. doi:10.17226/10027
- 451 11 Polinski JM, Barker T, Gagliano N, *et al*. Patients’ Satisfaction with and Preference for Telehealth  
452 Visits. *J Gen Intern Med* 2016;**31**:269–75. doi:10.1007/s11606-015-3489-x
- 453 12 Thiagarajan A, Grant C, Griffiths F, *et al*. Exploring patients’ and clinicians’ experiences of  
454 video consultations in primary care: A systematic scoping review. *BJGP Open* 2020;**4**.  
455 doi:10.3399/bjgpopen20X101020
- 456 13 Jong M, Mendez I, Jong R. Enhancing access to care in northern rural communities via telehealth.  
457 *Int J Circumpolar Health* 2019;**78**. doi:10.1080/22423982.2018.1554174
- 458 14 Bradford NK, Caffery LJ, Smith AC. Correction: Telehealth services in rural and remote  
459 Australia: A systematic review of models of care and factors influencing success and sustainability  
460 [Rural and Remote Health, 16, (2016) 4268]. *Rural Remote Health*. 2016;**16**.  
461 doi:10.22605/RRH4268
- 462 15 Li JPO, Thomas AAP, Kilduff CLS, *et al*. Safety of video-based telemedicine compared to in-  
463 person triage in emergency ophthalmology during COVID-19. *EclinicalMedicine* 2021;**34**.  
464 doi:10.1016/j.eclinm.2021.100818
- 465 16 Monaghesh E, Hajizadeh A. The role of telehealth during COVID-19 outbreak: A systematic  
466 review based on current evidence. *BMC Public Health*. 2020;**20**:1–9. doi:10.1186/s12889-020-  
467 09301-4
- 468 17 Lin CH, Tseng WP, Wu JL, *et al*. A double triage and telemedicine protocol to optimize infection  
469 control in an emergency department in Taiwan during the COVID-19 pandemic: Retrospective  
470 feasibility study. *J Med Internet Res* 2020;**22**. doi:10.2196/20586
- 471 18 Roberts A, Garrett L, Godden DJ. Can telehealth deliver for rural Scotland? lessons from the  
472 argyll & bute telehealth programme. *Scott Med J* 2012;**57**:33–7. doi:10.1258/smj.2011.011288
- 473 19 Terschüren C, Fendrich K, van den Berg N, *et al*. Implementing telemonitoring in the daily routine  
474 of a GP practice in a rural setting in northern Germany. *J Telemed Telecare* 2007;**13**:197–201.  
475 doi:10.1258/135763307780908003
- 476 20 Steventon A, Bardsley M, Billings J, *et al*. Effect of telehealth on use of secondary care and  
477 mortality: Findings from the Whole System Demonstrator cluster randomised trial. *BMJ* 2012;**344**.  
478 doi:10.1136/bmj.e3874

- 479 21 Affinito L, Fontanella A, Montano N, *et al.* How physicians can empower patients with digital  
480 tools: A joint study of the Italian Scientific Society of Internal Medicine (FADOI) and the  
481 European Federation of Internal Medicine (EFIM). *J Public Heal* Published Online First: 2020.  
482 doi:10.1007/s10389-020-01370-4
- 483 22 McGloin H, O’Connell D, Glacken M, *et al.* Patient empowerment using electronic telemonitoring  
484 with telephone support in the transition to insulin therapy in adults with type 2 diabetes:  
485 Observational, pre-post, mixed methods study. *J Med Internet Res* 2020;**22**. doi:10.2196/16161
- 486 23 Bower P, Cartwright M, Hirani SP, *et al.* A comprehensive evaluation of the impact of  
487 telemonitoring in patients with long-term conditions and social care needs: protocol for the whole  
488 systems demonstrator cluster randomised trial. *BMC Heal Serv Res* 2011 *111* 2011;**11**:1–12.  
489 doi:10.1186/1472-6963-11-184
- 490 24 European Commission. Market study on telemedicine. *Eur Comm* 2018;:132.<http://europa.eu>  
491 (accessed 13 Jul 2021).
- 492 25 Majeed A, Maile EJ, Bindman AB. The primary care response to COVID-19 in England’s  
493 National Health Service. *J. R. Soc. Med.* 2020;**113**:208–10. doi:10.1177/0141076820931452
- 494 26 Tsopra R, Frappe P, Streit S, *et al.* Reorganisation of GP surgeries during the COVID-19 outbreak:  
495 analysis of guidelines from 15 countries. *BMC Fam Pract* 2021;**22**:1–16. doi:10.1186/s12875-021-  
496 01413-z
- 497 27 Andrea Downey. Coronavirus: GPs urged to go digital to prevent spread of COVID-19.  
498 2020.[https://www.digitalhealth.net/2020/03/gps-urged-to-go-digital-to-prevent-spread-of-](https://www.digitalhealth.net/2020/03/gps-urged-to-go-digital-to-prevent-spread-of-coronavirus/)  
499 [coronavirus/](https://www.digitalhealth.net/2020/03/gps-urged-to-go-digital-to-prevent-spread-of-coronavirus/) (accessed 13 Jul 2021).
- 500 28 Neves A, Lygidakis H, Fontana G. The technology legacy of COVID-19 in primary care.  
501 *bjgp*life.com Published Online First: 2020.[https://bjgpilife.com/2020/04/15/the-technology-legacy-](https://bjgpilife.com/2020/04/15/the-technology-legacy-of-covid-19-in-primary-care/)  
502 [of-covid-19-in-primary-care/](https://bjgpilife.com/2020/04/15/the-technology-legacy-of-covid-19-in-primary-care/) (accessed 24 Nov 2020).
- 503 29 Shaghghi A, Bhopal RS, Sheikh A. Approaches to Recruiting ‘Hard-To-Reach’ Populations into  
504 Re-search: A Review of the Literature. *Heal Promot Perspect* 2011;**1**:86–94.  
505 doi:10.5681/hpp.2011.009
- 506 30 Atkinson R, Flint J. Social Research Update 33: Accessing Hidden and Hard-to-Reach  
507 Populations. *Soc Res Updat* 2001;**Summer**:3.<https://sru.soc.surrey.ac.uk/SRU33.html> (accessed  
508 13 Jul 2021).
- 509 31 Avery L, Rotondi N, McKnight C, *et al.* Unweighted regression models perform better than  
510 weighted regression techniques for respondent-driven sampling data: Results from a simulation  
511 study. *BMC Med Res Methodol* 2019;**19**:1–13. doi:10.1186/s12874-019-0842-5
- 512 32 About Miro | Meet the team | Our mission. <https://miro.com/about/> (accessed 22 Jul 2021).
- 513 33 Suter W. Introduction to Educational Research: A Critical Thinking Approach. *Introd to Educ Res*  
514 *A Crit Think Approach* Published Online First: 23 December 2014. doi:10.4135/9781483384443
- 515 34 Al-Busaidi ZQ. Qualitative research and its uses in health care. *Sultan Qaboos Univ. Med. J.*  
516 2008;**8**:11–9.
- 517 35 Booth A, Hannes K, Harden A, *et al.* COREQ (Consolidated Criteria for Reporting Qualitative  
518 Studies). *Guidel Report Heal Res A User’s Man* 2014;:214–26.  
519 doi:10.1002/9781118715598.CH21
- 520 36 Majeed A, Molokhia M, Pankhania B, *et al.* Protecting the health of doctors during the COVID-19  
521 pandemic. *Br J Gen Pract* 2020;**70**:268. doi:10.3399/BJGP20X709925
- 522 37 Sikka N, Willis J, Fitall E, *et al.* Telehealth and Patient Safety During the COVID-19 Response |  
523 PSNet. 2020.[https://psnet.ahrq.gov/perspective/telehealth-and-patient-safety-during-covid-19-](https://psnet.ahrq.gov/perspective/telehealth-and-patient-safety-during-covid-19-response)  
524 [response](https://psnet.ahrq.gov/perspective/telehealth-and-patient-safety-during-covid-19-response) (accessed 13 Jul 2021).
- 525 38 Murphy M, Scott LJ, Salisbury C, *et al.* Implementation of remote consulting in UK primary care  
526 following the COVID-19 pandemic: A mixed-methods longitudinal study. *Br J Gen Pract*  
527 2021;**71**:E166–77. doi:10.3399/BJGP.2020.0948
- 528 39 Flodgren G, Rachas A, Farmer AJ, *et al.* Interactive telemedicine: Effects on professional practice  
529 and health care outcomes. *Cochrane Database Syst. Rev.* 2015;**2015**.

- 530 doi:10.1002/14651858.CD002098.pub2
- 531 40 Inglis SC, Clark RA, McAlister FA, *et al.* Structured telephone support or telemonitoring  
532 programmes for patients with chronic heart failure. In: *Cochrane Database of Systematic Reviews*.  
533 Cochrane Database Syst Rev 2010. doi:10.1002/14651858.cd007228.pub2
- 534 41 Henderson C, Knapp M, Fernández JL, *et al.* Cost effectiveness of telehealth for patients with long  
535 term conditions (Whole Systems Demonstrator telehealth questionnaire study): Nested economic  
536 evaluation in a pragmatic, cluster randomised controlled trial. *BMJ* 2013;**346**.  
537 doi:10.1136/bmj.f1035
- 538 42 Polisen J, Tran K, Cimon K, *et al.* Home telehealth for chronic obstructive pulmonary disease: A  
539 systematic review and meta-analysis. *J Telemed Telecare* 2010;**16**:120–7.  
540 doi:10.1258/jtt.2009.090812
- 541 43 Polisen J, Tran K, Cimon K, *et al.* Home telehealth for diabetes management: A systematic  
542 review and meta-analysis. *Diabetes, Obes. Metab.* 2009;**11**:913–30. doi:10.1111/j.1463-  
543 1326.2009.01057.x
- 544 44 Stamenova V, Agarwal P, Kelley L, *et al.* Uptake and patient and provider communication  
545 modality preferences of virtual visits in primary care: a retrospective cohort study in Canada. *BMJ*  
546 *Open* 2020;**10**:e037064. doi:10.1136/bmjopen-2020-037064
- 547 45 Graetz I, Huang J, Muelly E, *et al.* Patient choice of telemedicine increases timeliness of primary  
548 care visits. *AMIA Annu Symp Proc* 2020;**2020**:502./pmc/articles/PMC8075419/ (accessed 13 Jul  
549 2021).
- 550 46 Ray KN, Chari A V., Engberg J, *et al.* Disparities in Time Spent Seeking Medical Care in the  
551 United States. *JAMA Intern Med* 2015;**175**:1983–6. doi:10.1001/JAMAINTERNMED.2015.4468
- 552 47 Howland M, Tennant M, Bowen DJ, *et al.* Psychiatrist and Psychologist Experiences with  
553 Telehealth and Remote Collaborative Care in Primary Care: A Qualitative Study. *J Rural Heal*  
554 Published Online First: 2020. doi:10.1111/JRH.12523
- 555 48 Fabian Buddy Pascoal, Nadya Vera Simanjuntak and WA. The Rise of Telemedicine in  
556 Indonesia. Dentons HPRP. 2021.[https://www.dentons.com/en/insights/articles/2020/july/20/the-](https://www.dentons.com/en/insights/articles/2020/july/20/the-rise-of-telemedicine-in-indonesia)  
557 [rise-of-telemedicine-in-indonesia](https://www.dentons.com/en/insights/articles/2020/july/20/the-rise-of-telemedicine-in-indonesia) (accessed 13 Jul 2021).
- 558 49 Perri MG, Shankar MN, Daniels MJ, *et al.* Effect of Telehealth Extended Care for Maintenance of  
559 Weight Loss in Rural US Communities: A Randomized Clinical Trial. *JAMA Netw open*  
560 2020;**3**:e206764. doi:10.1001/jamanetworkopen.2020.6764
- 561 50 Greenhalgh T, Shaw S, Wherton J, *et al.* Real-world implementation of video outpatient  
562 consultations at macro, meso, and micro levels: Mixed-method study. *J Med Internet Res* 2018;**20**.  
563 doi:10.2196/jmir.9897
- 564 51 Brant H, Atherton H, Ziebland S, *et al.* Using alternatives to face-to-face consultations: A survey  
565 of prevalence and attitudes in general practice. *Br J Gen Pract* 2016;**66**:e460–6.  
566 doi:10.3399/bjgp16X685597
- 567 52 Chang JE, Lai AY, Gupta A, *et al.* Rapid Transition to Telehealth and the Digital Divide:  
568 Implications for Primary Care Access and Equity in a Post-COVID Era. *Milbank Q* 2021;**99**:340–  
569 68. doi:10.1111/1468-0009.12509
- 570 53 Hausman DM. *EconPapers: Preference, Value, Choice, and Welfare*. Cambridge Univ. Press.  
571 2012.<https://econpapers.repec.org/bookchap/cupcbooks/9781107695122.htm> (accessed 13 Jul  
572 2021).
- 573 54 Gilbert AW, Jones J, Stokes M, *et al.* Factors that influence patient preferences for virtual  
574 consultations in an orthopaedic rehabilitation setting: A qualitative study. *BMJ Open*  
575 2021;**11**:e041038. doi:10.1136/bmjopen-2020-041038
- 576 55 Levy H, Janke AT, Langa KM. Health Literacy and the Digital Divide Among Older Americans. *J*  
577 *Gen Intern Med* 2015;**30**:284. doi:10.1007/S11606-014-3069-5
- 578 56 Zide M, Caswell K, Peterson E, *et al.* Consumers' Patient Portal Preferences and Health Literacy:  
579 A Survey Using Crowdsourcing. *JMIR Res Protoc* 2016;**5**:e104. doi:10.2196/resprot.5122
- 580 57 Ahmed S, Sanghvi K, Yeo D. Telemedicine takes centre stage during COVID-19 pandemic. *BMJ*

581 Innov. 2020;**6**:252–4. doi:10.1136/bmjinnov-2020-000440  
582 58 Webster P. Virtual health care in the era of COVID-19. *Lancet* (London, England).  
583 2020;**395**:1180–1. doi:10.1016/S0140-6736(20)30818-7  
584 59 COVID-19: video consultations and homeworking. [https://www.bma.org.uk/advice-and-](https://www.bma.org.uk/advice-and-support/covid-19/adapting-to-covid/covid-19-video-consultations-and-homeworking)  
585 [support/covid-19/adapting-to-covid/covid-19-video-consultations-and-homeworking](https://www.bma.org.uk/advice-and-support/covid-19/adapting-to-covid/covid-19-video-consultations-and-homeworking) (accessed 13  
586 Jul 2021).  
587 60 Baird B, Beech J, Chauhan K, *et al.* Remote working toolkit for general practices and primary care  
588 networks | The King’s Fund. Kings Fund.  
589 2021.<https://www.kingsfund.org.uk/publications/remote-working-toolkit-general-practices-pcns>  
590 (accessed 13 Jul 2021).  
591 61 Hollander JE, Carr BG. Virtually Perfect? Telemedicine for Covid-19. *N Engl J Med*  
592 2020;**382**:1679–81. doi:10.1056/nejmp2003539  
593 62 Blandford A, Wesson J, Amalberti R, *et al.* Opportunities and challenges for telehealth within, and  
594 beyond, a pandemic. *Lancet Glob. Heal.* 2020;**8**:e1364–5. doi:10.1016/S2214-109X(20)30362-4  
595  
596  
597  
598

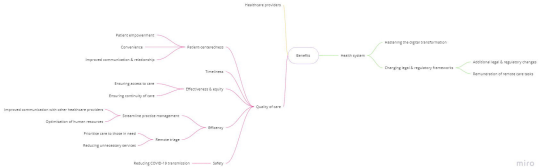

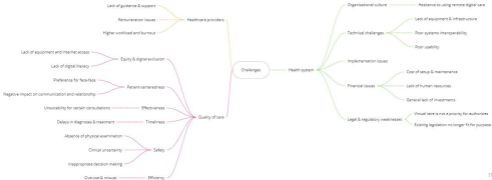



## Contextual Considerations

- Examine patients' and providers' willingness to use virtual care and their perceived barriers to use
- Account for cultural factors and norms for all stakeholders which may affect remote care access patterns
- Provide viable alternative processes for patients and providers that prefer face-to-face care



## Technology Infrastructure

- Strategies remain: care systems, interoperability, middleware, and cybersecurity
- Increase availability of resources to vulnerable patient groups and communities while ensuring non-patient based alternatives (e.g., choice of the provider, levels of services)
- Maximize interoperability standards and data sharing, interoperability in the development of novel virtual care solutions



## Awareness & Experience

- Provide patients and providers with additional training and support to enhance digital proficiency and encourage the development of relevant digital skills
- Involve patients and providers in the co-development of virtual care opportunities to assess for usability, user-friendliness, efficacy, and safety
- Highlight the user-centric design of services with an emphasis on usability, consistent design, consistent access, all forms of devices, minimal end-user resource requirements, and ease of maintenance



## Safety & Risk Management

- Develop decision support tools to identify cases in which a face-to-face consultation is required
- Define pathways and processes to determine those suitable for virtual care and provide timely access to those in need
- Develop formal guidance to evaluate the usability for remote physical examinations, minimize diagnostic uncertainty, and optimize clinical decision-making



## Strategic Planning & Supporting Policies

- Develop a coherent, long-term vision for the use of virtual care
- Secure continued financial support for all plans necessary for the delivery of virtual care (e.g., for human resources, equipment, and infrastructure)
- Develop a sustainable, long-term reimbursement and compensation structure to ensure the viability of remote care
- Ensure that legal and regulatory frameworks are updated to cover remote care activities
- Develop a clear communication strategy on virtual care for patients and providers

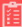

## Monitoring & Evaluation

- To systematically capture information and evaluate the impact on the five areas identified
- To consider the impact on the six domains of quality of care (access, convenience, effectiveness, efficiency, safety, timeliness and equity)
- Collect on a variety of data sources, including patient and provider feedback, but also using data-driven approaches
- Use evidence to inform decisions to adapt remote care services
